# Supplementary material for: Exploring the potential of IL-10 for risk assessment and early intervention in pediatric ALL
Source: PubMed Central journal article supplement (PMC11308622; doi:10.1186/s12885-024-12677-w), 2024-08-08
Supplement: 12885_2024_12677_MOESM1_ESM.pdf [file 12885_2024_12677_MOESM1_ESM.pdf]

### Supplementary Table 1:

**S1. Genetic features of studied SNPs according to National Center for Biotechnology Information (NCBI).**

| ID                 | <i>IL10</i> -1082 A/G                                                                               |
|--------------------|-----------------------------------------------------------------------------------------------------|
|                    | rs1800896                                                                                           |
| Alleles            | AG                                                                                                  |
| Reference Allele   | A                                                                                                   |
| Alternative allele | G                                                                                                   |
| Gene               | IL10                                                                                                |
| Chromosome         | 1                                                                                                   |
| Reference          | <a href="https://www.ncbi.nlm.nih.gov/snp/rs1800896">https://www.ncbi.nlm.nih.gov/snp/rs1800896</a> |

The studied SNP, **rs1800896** is composed of A and G alleles, A is the reference and G is the alternative allele, it is located within *IL10* gene, on chromosome 1.

**Supplementary Figures 1,2**, Full Agarose gel electrophoresis for *IL10* genotypes from different exposures: ladder size marker (M) 50-1000 bp. Where **G** allele at 288bp and **A** allele at 197 bp. 430 bp as internal control. (**Supplementary**)

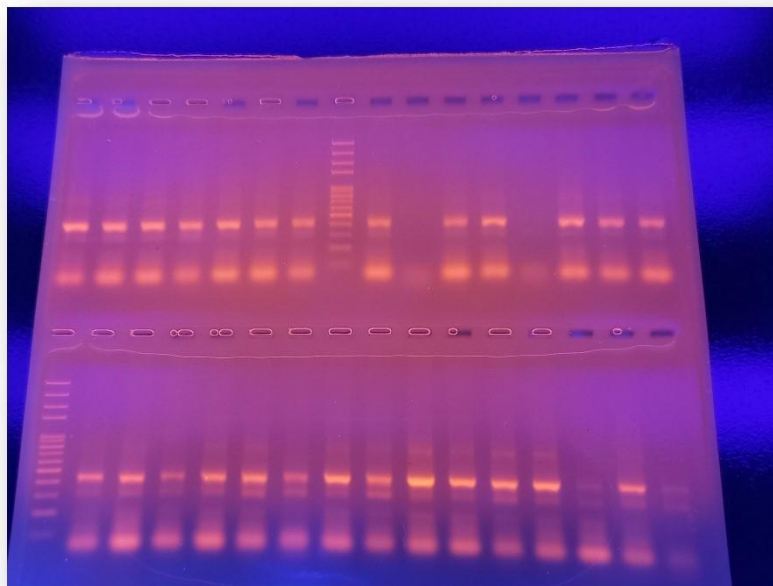

**Supplementary Figure 1: S1**

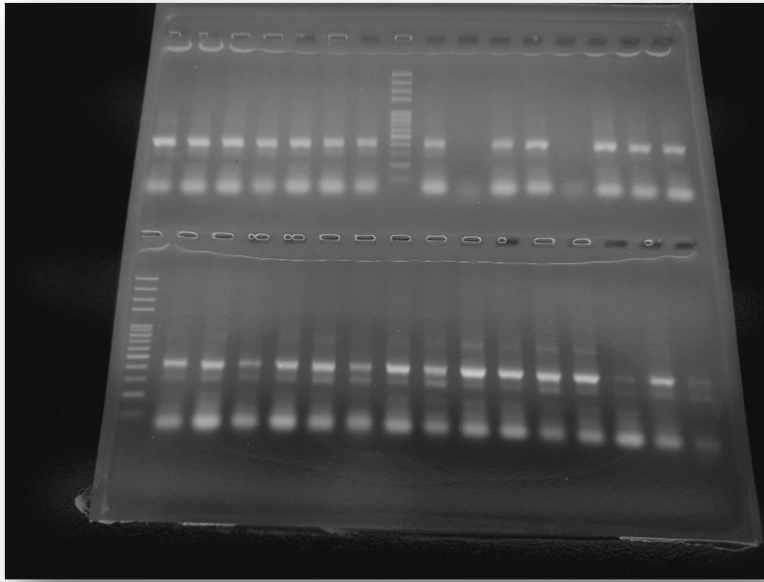

**Supplementary Figure 2: S2**

**Supplementary Table 2:**

*S2. Association between IL10 -1082 A/G (rs1800896) with clinical presentation among ALL patients.*

|                                 | <i>IL10 -1082 A/G (rs1800896)</i> |        |                            |       |                            |       | $X^2$ | <i>p</i>     |
|---------------------------------|-----------------------------------|--------|----------------------------|-------|----------------------------|-------|-------|--------------|
|                                 | <i>AA</i><br><i>n = 13</i>        |        | <i>AG</i><br><i>n = 40</i> |       | <i>GG</i><br><i>n = 47</i> |       |       |              |
| <b><i>Fever</i></b>             |                                   |        |                            |       |                            |       |       |              |
| <i>Absent</i>                   | 0                                 | 0.0%   | 14                         | 35.0% | 10                         | 21.3% | 9.766 | <b>0.008</b> |
| <i>Present</i>                  | 13                                | 100.0% | 26                         | 65.0% | 37                         | 78.7% |       |              |
| <b><i>Pallor</i></b>            |                                   |        |                            |       |                            |       |       |              |
| <i>Absent</i>                   | 1                                 | 7.7%   | 17                         | 42.5% | 18                         | 38.3% | 6.527 | <b>0.038</b> |
| <i>Present</i>                  | 12                                | 92.3%  | 23                         | 57.5% | 29                         | 61.7% |       |              |
| <b><i>Fatigue</i></b>           |                                   |        |                            |       |                            |       |       |              |
| <i>Absent</i>                   | 2                                 | 15.4%  | 14                         | 35.0% | 15                         | 31.9% | 1.997 | 0.368        |
| <i>Present</i>                  | 11                                | 84.6%  | 26                         | 65.0% | 32                         | 68.1% |       |              |
| <b><i>Bleeding Tendency</i></b> |                                   |        |                            |       |                            |       |       |              |
| <i>Absent</i>                   | 12                                | 92.3%  | 31                         | 77.5% | 36                         | 76.6% | 1.940 | 0.379        |
| <i>Present</i>                  | 1                                 | 7.7%   | 9                          | 22.5% | 11                         | 23.4% |       |              |

*X<sup>2</sup>, chi square test.*

Fever and pallor differed significantly between rs1800896 genotypes, with the highest incidence associated with AA genotype, followed by GG, and AG genotypes ( $p=0.008, 0.038$  respectively). Fatigue and bleeding tendency were not affected by rs1800896 genotypes ( $p>0.05$  for each).

**Supplementary Table 3:**

**S3. Association between IL10 –1082 A/G (rs1800896) with organomegaly among ALL patients.**

|                        | IL10 –1082 A/G (rs1800896) |       |                |       |                |       | $X^2$ | $p$   |
|------------------------|----------------------------|-------|----------------|-------|----------------|-------|-------|-------|
|                        | AA<br>$n = 13$             |       | AG<br>$n = 40$ |       | GG<br>$n = 47$ |       |       |       |
| <b>Splenomegaly</b>    |                            |       |                |       |                |       |       |       |
| Absent                 | 11                         | 84.6% | 20             | 50.0% | 32             | 68.1% | 6.312 | 0.043 |
| Present                | 2                          | 15.4% | 20             | 50.0% | 15             | 31.9% |       |       |
| <b>Hepatomegaly</b>    |                            |       |                |       |                |       |       |       |
| Absent                 | 3                          | 23.1% | 17             | 42.5% | 21             | 44.7% | 2.155 | 0.340 |
| Present                | 10                         | 76.9% | 23             | 57.5% | 26             | 55.3% |       |       |
| <b>Lymphadenopathy</b> |                            |       |                |       |                |       |       |       |
| Absent                 | 1                          | 7.7%  | 17             | 42.5% | 20             | 42.6% | 7.104 | 0.029 |
| Present                | 12                         | 92.3% | 23             | 57.5% | 27             | 57.4% |       |       |

$X^2$ , chi square test.

Splenomegaly differed significantly between rs1800896 genotypes, with the highest incidence associated with AG genotype, followed by GG, and AA genotypes ( $p=0.043$ ). Moreover, lymphadenopathy differed significantly between rs1800896 genotypes, with the highest incidence associated with AA genotype, followed by AG, and GG genotypes ( $p= 0.038$ ). Hepatomegaly was not affected by rs1800896 genotypes ( $p>0.05$ ).

**Supplementary Table 4:**

**S4. Serologic data among patients with ALL.**

|            | ALL<br>$n = 100$ |      |
|------------|------------------|------|
|            | Number           | %    |
| <b>CRP</b> |                  |      |
| Negative   | 61               | 61.0 |
| Positive   | 39               | 39.0 |

Among all studied ALL cases, 39% had positive CRP and 61% had negative CRP.

**Supplementary Table 5:**

**S5. Association between IL10 –1082 A/G (rs1800896) with CRP among ALL patients.**

|            | IL10 –1082 A/G (rs1800896) |                |                | Test ( $p1$ ) | Post hoc test |    |    |
|------------|----------------------------|----------------|----------------|---------------|---------------|----|----|
|            | AA<br>$n = 13$             | AG<br>$n = 40$ | GG<br>$n = 47$ |               | P2            | P3 | P4 |
| <b>CRP</b> |                            |                |                |               |               |    |    |

|          |            |            |            |                         |       |       |       |
|----------|------------|------------|------------|-------------------------|-------|-------|-------|
| Negative | 12 (92.3%) | 17 (42.5%) | 32 (68.1%) | $X^2 = 12.1, p = 0.002$ | 0.002 | 0.153 | 0.016 |
| Positive | 1 (7.7%)   | 23 (57.5%) | 15 (31.9%) |                         |       |       |       |

$X^2$ , chi square test.

*P1: comparison between AA, AG and GG*

*P2: comparison between AA, AG*

*P3: comparison between AA, GG*

*P4: comparison between AG, GG*

CRP differed significantly between rs1800896 genotypes ( $p_1 = 0.002$ ). This was attributed to significant association of positive CRP with AG when compared to AA ( $p_2 = 0.002$ ), as well as when compared to GG ( $p_4 = 0.016$ ).

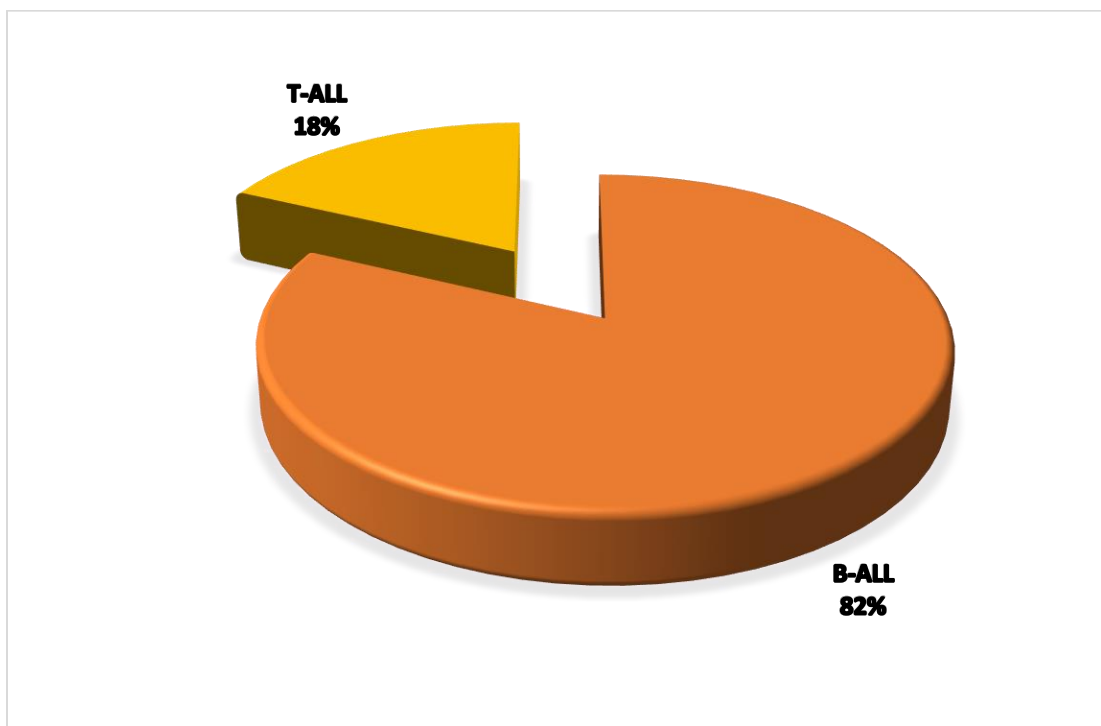

**Supplementary Figure 3: S3. Immunophenotyping among patients with ALL**

**Supplementary Table 6:**

**S6. Association between IL10 -1082 A/G (rs1800896) with FAB among ALL patients.**

|            | IL10 -1082 A/G (rs1800896) |                |                | Test ( $p_1$ ) | Post hoc test |       |       |
|------------|----------------------------|----------------|----------------|----------------|---------------|-------|-------|
|            | AA<br>$n = 13$             | AG<br>$n = 40$ | GG<br>$n = 47$ |                | $P_2$         | $P_3$ | $P_4$ |
| <b>FAB</b> |                            |                |                |                |               |       |       |
| <i>L1</i>  | 9 (69.2%)                  | 31 (77.5%)     | 23 (48.9%)     |                | 0.712         | 0.194 | 0.006 |

|    |           |           |            |                               |  |  |  |
|----|-----------|-----------|------------|-------------------------------|--|--|--|
| L2 | 4 (30.8%) | 9 (22.5%) | 24 (51.1%) | $X^2 = 7.812,$<br>$p = 0.020$ |  |  |  |
|----|-----------|-----------|------------|-------------------------------|--|--|--|

*X<sup>2</sup>, chi square test.*

*P1: comparison between AA, AG and GG*

*P2: comparison between AA, AG*

*P3: comparison between AA, GG*

*P4: comparison between AG, GG*

FAB classification differed significantly between rs1800896 genotypes ( $p = 0.020$ ). This was attributed to significant association of L1 with AG when compared to GG, as well as L2 with GG when compared to AG ( $p = 0.006$ ).
